# Supplementary material
Source: ML conference proceedings conference paper supplement (https://proceedings.neurips.cc/paper_files/paper/2019/hash/335cd1b90bfa4ee70b39d08a4ae0cf2d-Abstract.html)
Supplement: Supplementary file [file 335cd1b90bfa4ee70b39d08a4ae0cf2d-Supplemental.zip]

## A Comparison between Bounds

We first use simulation to show our proposed bound is higher than the one from PixelDP [18].

In PixelDP, the upper bound for the size of attacks is indirectly defined: if  $p_{(1)} \geq e^{2\epsilon} p_{(2)} + (1 + e^\epsilon)$ , where  $\epsilon > 0$  and  $\delta > 0$  are two tuning parameters, and the added noise has the distribution  $N(0, \sigma^2 I)$ , then the classifier is robust to attacks whose  $\ell_2$  size is less than  $\frac{\sigma\epsilon}{\sqrt{2 \log(1.25/\delta)}}$ .

As both our and their bound are determined by the models and data only through  $p_{(1)}$  and  $p_{(2)}$ , it is sufficient to compare them with simulation for different  $p_{(1)}$  and  $p_{(2)}$  as long as  $p_{(1)} \geq p_{(2)} \geq 0$ ,  $p_{(1)} + p_{(2)} \leq 1$  and  $p_{(1)} + p_{(2)} \geq 0.2$  are satisfied, *i.e.*,  $p_{(1)}$  and  $p_{(2)}$  are valid first and second largest output probabilities.

For fixed  $\sigma$ ,  $\epsilon$  and  $\delta$  are tuning parameters that affect the result. For a fair comparison, we use a grid search to find  $\epsilon$  and  $\delta$  that maximizes their bound.

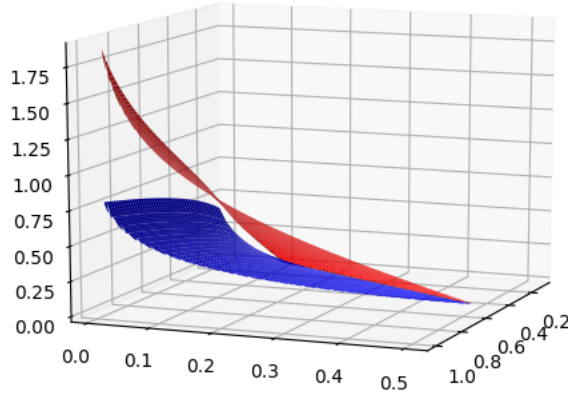

Figure 5: The upper bounds under different  $p_{(1)}$  and  $p_{(2)}$ . Our bound (red) is strictly higher than the one from PixelDP (blue).

The simulation result in Figure 5 shows our bound is strictly higher than the one from PixelDP. In particular, when  $p_{(1)}$  and  $p_{(2)}$  are far apart, which is the most common case in practice, our bound is more than twice as high as theirs.

## B Proof of Lemma 1

**Lemma 1** Let  $P = (p_1, \dots, p_k)$  and  $Q = (q_1, \dots, q_k)$  be two multinomial distributions over the same index set  $\{1, \dots, k\}$ . If the indexes of the largest probabilities do not match on  $P$  and  $Q$ , that is  $\operatorname{argmax}_i p_i \neq \operatorname{argmax}_j q_j$ , then

$$D_\alpha(Q \| P) \geq -\log \left( 1 - p_{(1)} - p_{(2)} + 2 \left( \frac{1}{2} \left( p_{(1)}^{1-\alpha} + p_{(2)}^{1-\alpha} \right) \right)^{\frac{1}{1-\alpha}} \right) \quad (2)$$

where  $p_{(1)}$  and  $p_{(2)}$  are the largest and the second largest probabilities in  $p_i$ 's.

**Proof** Think of this problem as finding  $Q$  that minimizes  $D_\alpha(Q \| P)$  such that  $\operatorname{argmax} p_i \neq \operatorname{argmax} q_i$  for fixed  $P = (p_1, \dots, p_k)$ . Without loss of generality, assume  $p_1 \geq p_2 \geq \dots \geq p_k$ .

It is equivalent to solving the following problem:

$$\min_{\sum q_i = 1, \operatorname{argmax} q_i \neq 1} \frac{1}{1-\alpha} \log \left( \sum_{i=1}^k p_i \left( \frac{q_i}{p_i} \right)^\alpha \right)$$

As the logarithm is a monotonically increasing function, we only focus on the quantity  $s(Q\|P) = \sum_{i=1}^k p_i \left(\frac{q_i}{p_i}\right)^\alpha$  part for fixed  $\alpha$ .

We first show for the  $Q$  that minimizes  $s(Q\|P)$ , it must have  $q_1 = q_2 \geq q_3 \geq \dots \geq q_k$ . Note here we allow a tie, because we can always let  $q_1 = q_1 - \epsilon$  and  $q_2 = q_2 + \epsilon$  for some small  $\epsilon$  to satisfy  $\operatorname{argmax} q_i \neq 1$  while not changing the Renyi-divergence too much by the continuity of  $s$ .

If  $q_j > q_i$  for some  $j \geq i$ , we can define  $Q'$  by mutating  $q_i$  and  $q_j$ , that is  $Q' = (q_1, \dots, q_{i-1}, q_j, q_{i+1}, \dots, q_{j-1}, q_i, q_{j+1}, \dots, q_k)$ , then

$$\begin{aligned} & s(Q\|P) - s(Q'\|P) \\ &= p_i \left( \frac{q_i^\alpha - q_j^\alpha}{p_i^\alpha} \right) + p_j \left( \frac{q_j^\alpha - q_i^\alpha}{p_j^\alpha} \right) \\ &= (p_i^{1-\alpha} - p_j^{1-\alpha})(q_i^\alpha - q_j^\alpha) > 0 \end{aligned}$$

which conflicts with the assumption that  $Q$  minimizes  $s(Q\|P)$ . Thus  $q_i \geq q_j$  for  $j \geq i$ . Since  $q_1$  cannot be the largest, we have  $q_1 = q_2 \geq q_3 \geq \dots \geq q_k$ .

Then we are able to assume  $Q = (q_0, q_0, q_3, \dots, q_k)$ , and the problem can be formulated as

$$\begin{aligned} & \min_{q_0, q_2, \dots, q_k} p_1 \left( \frac{q_0}{p_1} \right)^\alpha + p_2 \left( \frac{q_0}{p_2} \right)^\alpha + \sum_{i=3}^k p_i \left( \frac{q_i}{p_i} \right)^\alpha \\ & \text{subject to } 2q_0 + q_3 + \dots + q_k = 1 \\ & \text{subject to } q_i - q_0 \leq 0 \quad i \geq 1 \\ & \text{subject to } -q_i \leq 0 \quad i \geq 0 \end{aligned}$$

which forms a set of KKT conditions. Using Lagrange multipliers, one can obtain the solution

$$q_0 = \frac{q^*}{1-p_1-p_2-2q^*} \text{ and } q_i = \frac{p_i}{1-p_1-p_2-2q^*} \text{ for } i \geq 3, \text{ where } q^* = \left( \frac{p_1^{1-\alpha} + p_2^{1-\alpha}}{2} \right)^{\frac{1}{1-\alpha}}.$$

Plug in these quantities, the minimized Renyi-divergence is

$$-\log \left( 1 - p_1 - p_2 + 2 \left( \frac{1}{2} (p_1^{1-\alpha} + p_2^{1-\alpha}) \right)^{\frac{1}{1-\alpha}} \right)$$

Thus, we obtain the lower bound of  $D_\alpha(Q\|P)$  for  $\operatorname{argmax} p_i \neq \operatorname{argmax} q_i$ . ■

## C Proof of Theorem 2

A simple result from information theory:

**Lemma 4** *Given two real-valued vectors  $\mathbf{x}_1$  and  $\mathbf{x}_2$ , the Rényi divergence of  $N(\mathbf{x}_1, \sigma^2 I)$  and  $N(\mathbf{x}_2, \sigma^2 I)$  is*

$$D_\alpha(N(\mathbf{x}_1, \sigma^2 I) \| N(\mathbf{x}_2, \sigma^2 I)) = \frac{\alpha \|\mathbf{x}_1 - \mathbf{x}_2\|_2^2}{2\sigma^2} \quad (3)$$

**Theorem 2** Suppose we have  $\mathbf{x} \in \mathcal{X}$ , and a potential adversarial example  $\mathbf{x}' \in \mathcal{X}$  such that  $\|\mathbf{x} - \mathbf{x}'\|_2 \leq L$ . Given a  $k$ -classifier  $f : \mathcal{X} \rightarrow \{1, \dots, k\}$ , let  $f(\mathbf{x} + N(\mathbf{0}, \sigma^2 I)) \sim (p_1, \dots, p_k)$  and  $f(\mathbf{x}' + N(\mathbf{0}, \sigma^2 I)) \sim (p'_1, \dots, p'_k)$ .

If the following condition is satisfied, with  $p_{(1)}$  and  $p_{(2)}$  being the first and second largest probabilities in  $p_i$ 's:

$$\sup_{\alpha > 1} \left( -\frac{2\sigma^2}{\alpha} \log \left( 1 - 2M_1(p_{(1)}, p_{(2)}) + 2M_{1-\alpha}(p_{(1)}, p_{(2)}) \right) \right) \geq L^2 \quad (4)$$

then  $\operatorname{argmax}_i p_i = \operatorname{argmax}_j p'_j$

**Proof** From lemma 4, we know for  $\mathbf{x}$  and  $\mathbf{x}'$  such that  $\|\mathbf{x} - \mathbf{x}'\|_2 \leq L$ , with a  $k$ -class classification function  $f : \mathcal{X} \rightarrow \{1, \dots, k\}$ :

$$\begin{aligned} & D_\alpha(f(\mathbf{x}' + N(\mathbf{0}, \sigma^2)) \| f(\mathbf{x} + N(\mathbf{0}, \sigma^2))) \\ & \leq D_\alpha(\mathbf{x}' + N(\mathbf{0}, \sigma^2) \| \mathbf{x} + N(\mathbf{0}, \sigma^2)) \\ & \leq \frac{\alpha L^2}{2\sigma^2} \end{aligned}$$

if  $N(\mathbf{0}, \sigma^2)$  is a standard Gaussian noise. The first inequality comes from the fact that  $D_\alpha(Q \| P) \geq D_\alpha(g(Q) \| g(P))$  for any function  $g$ .

Therefore, if we have

$$-\log(1 - 2M_1(p_{(1)}, p_{(2)}) + 2M_{1-\alpha}(p_{(1)}, p_{(2)})) \geq \frac{\alpha L^2}{2\sigma^2} \quad (5)$$

It implies

$$\begin{aligned} & D_\alpha(f(\mathbf{x}' + N(\mathbf{0}, \sigma^2)) \| f(\mathbf{x} + N(\mathbf{0}, \sigma^2))) \\ & \leq -\log(1 - 2M_1(p_{(1)}, p_{(2)}) + 2M_{1-\alpha}(p_{(1)}, p_{(2)})) \end{aligned} \quad (6)$$

Then from Lemma 1 we know that the index of the maximums of  $f(\mathbf{x} + N(\mathbf{0}, \sigma^2))$  and  $f(\mathbf{x}' + N(\mathbf{0}, \sigma^2))$  must be the same, which means they have the same prediction, thus implies robustness. ■

## D Details and Additional Results of the Experiments

In this section, we explain the details of our implementation of our models and include additional experimental results.

### D.1 Gradient-Free methods

We include results for Boundary Attack [9] which is a gradient-free attack method. Boundary attack explores adversarial examples along the decision boundary using a rejection sampling approach. Their construction of adversarial examples do not require information about the gradient of models, thus is an important complement to gradient-based methods.

We test Boundary attacks on MNIST and CIFAR10 and compare them to other attacks considered.

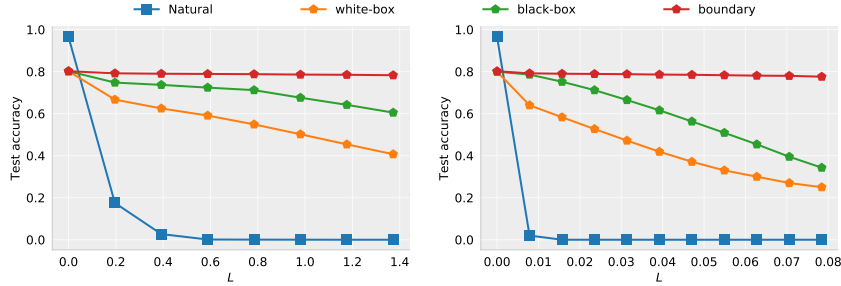

Figure 6: **MNIST:** Comparisons the adversarial robustness of STN against various types of attacks for both  $\ell_2$  (left) and  $\ell_\infty$  (right).

From the plots, one can see Boundary attack is not effective in attacking our models. This is consistent with the observation from [38] that gradient-free method is not effective against randomized models. Nevertheless, we include the results as a sanity check.

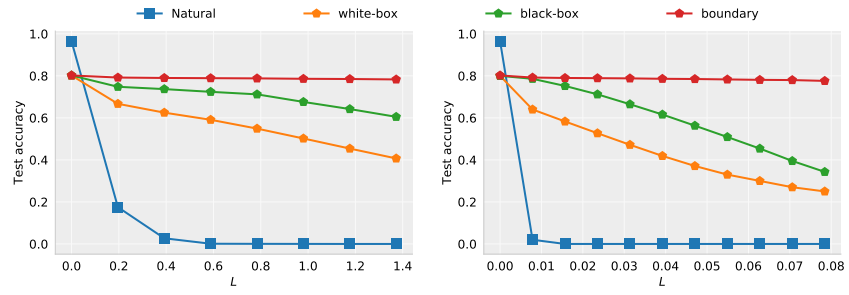

Figure 7: **CIFAR-10**: Comparisons the adversarial robustness of STN against various types of attacks for both  $\ell_2$  (left) and  $\ell_\infty$  (right).
